# Supplementary material for: Electronic and thermal conduction properties of halogenated porous graphene nanoribbons
Source: Royal Society of Chemistry journal article supplement (doi:10.1039/c7tc00029d), 2017-01-01
Supplement: c7tc00029d1.pdf [file c7tc00029d1.pdf]

## Supplementary Information

### A. Electronic band structures

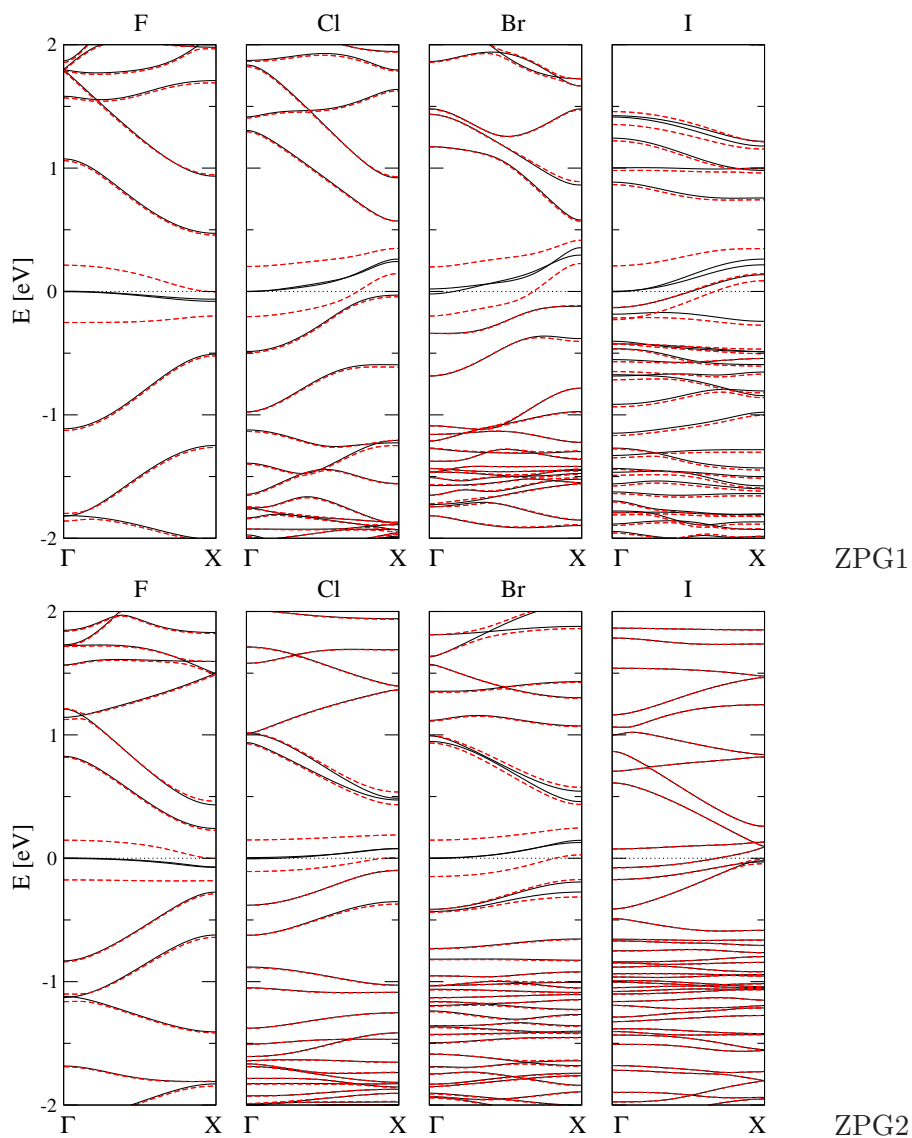

Figure S1: Electronic band structures of ZPG1 and ZPG2: spin unpolarized (black/solid) vs. spin polarized (red/dashed) calculations.

B. Spin density maps

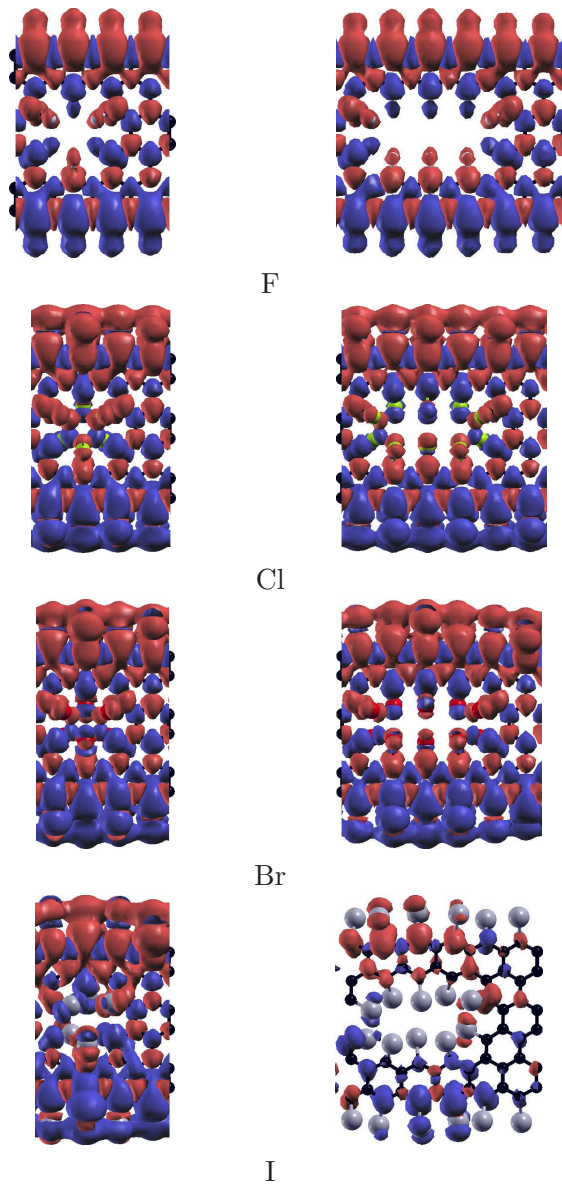

Figure S2: Spin density maps for ZPG1 (left) and ZPG2 (right).
